# Supplementary material for: Catalytic water oxidation on derivatized nanoITO
Source: Royal Society of Chemistry journal article supplement (doi:10.1039/c0dt00362j), 2010-01-01
Supplement: c0dt00362j.pdf [file c0dt00362j.pdf]

# Catalytic Water Oxidation on Derivatized *nanoITO*

Zuofeng Chen, Javier J. Concepcion, Jonathan F. Hull, Paul G. Hoertz, and Thomas J. Meyer\*

*Department of Chemistry, University of North Carolina at Chapel Hill, Chapel Hill, NC 27599,*

*USA*

## Supporting Information

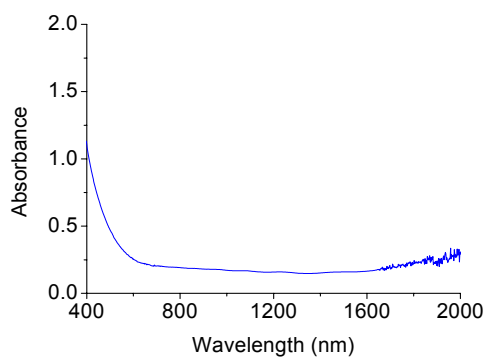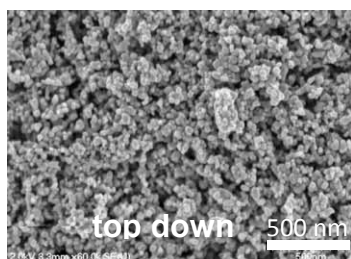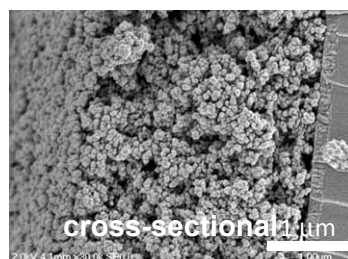

**Figure S1.** UV-vis-near IR spectrum and SEM images of *oxidized ITO|nanoITO*.

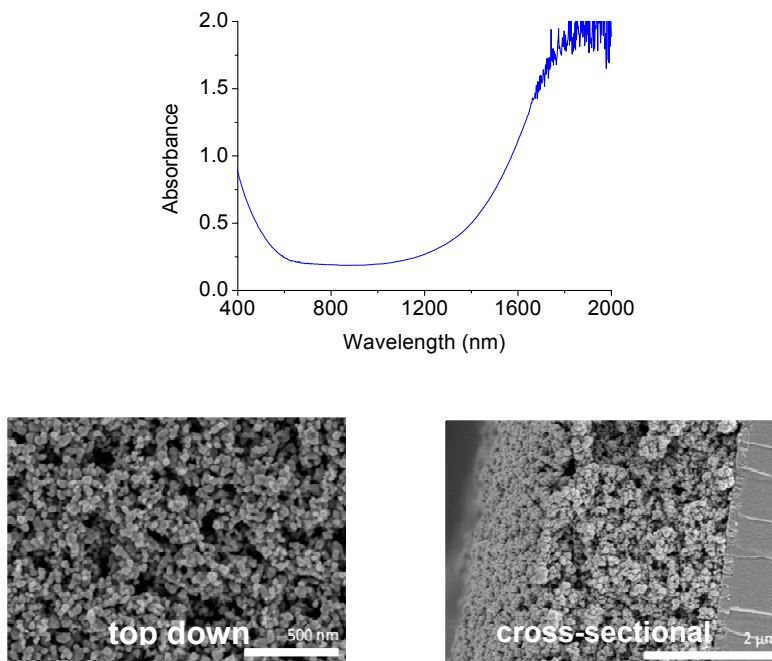

**Figure S2.** UV-vis-near IR spectrum and SEM images of *reduced ITO|nanoITO*.

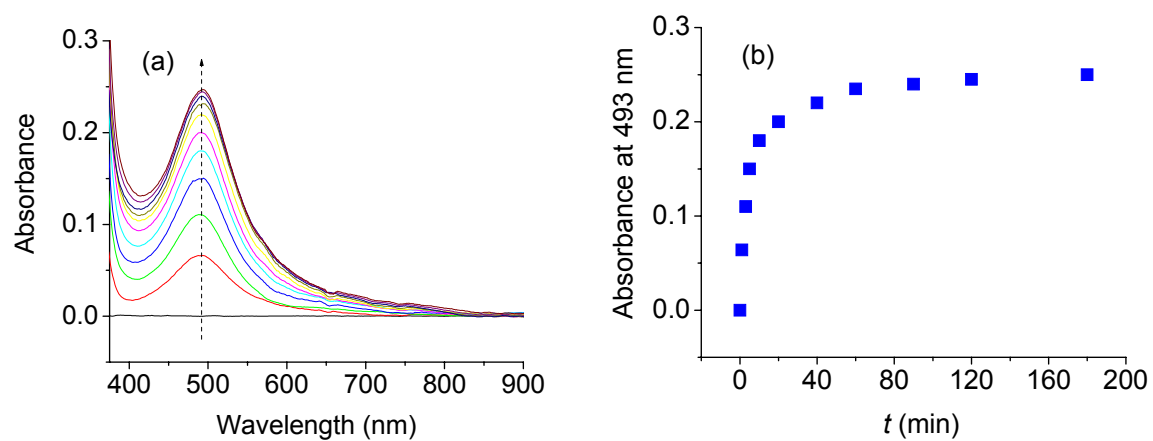

**Figure S3.** (a) UV-vis spectra of ITO|nanoITO|1-PO<sub>3</sub>H<sub>2</sub> after various soaking times in 0.1 mM solution in methanol. (b) Dependence of the absorbance at 493 nm on the soaking time.  $\Gamma_0 = 1.7 \times 10^{-8} \text{ mol/cm}^2$  (2.5  $\square$  m,  $6.8 \times 10^{-9} \text{ mol/cm}^2 \cdot \square$  m).

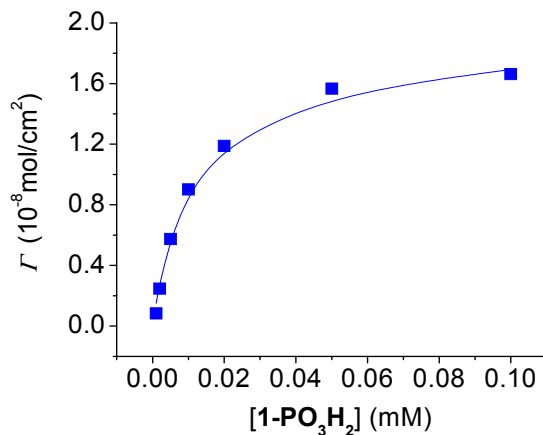

**Figure S4.** Adsorption isotherm for **1-PO<sub>3</sub>H<sub>2</sub>** on ITO|*nano*ITO after soaking in methanol stock solution of different concentration for 72 h at 25 °C.

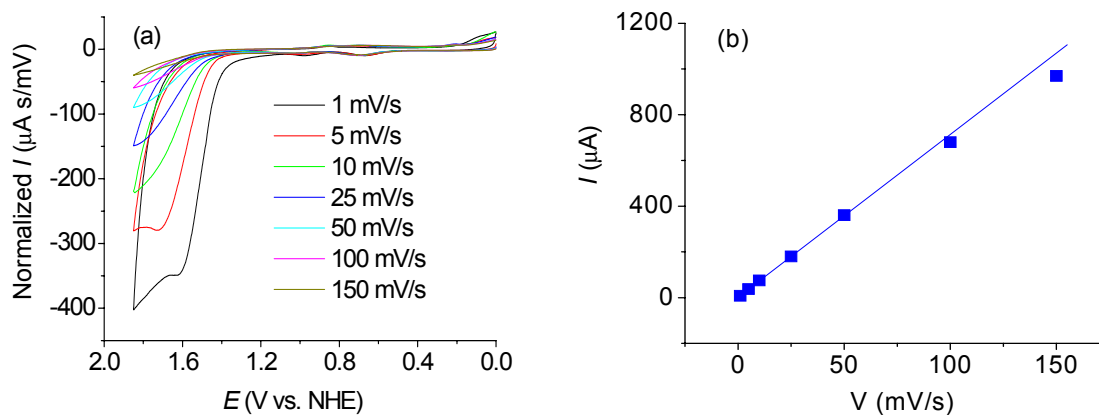

**Figure S5.** (a) Normalized cyclic voltammograms of ITO|*nano*ITO|**1-PO<sub>3</sub>H<sub>2</sub>** at pH 5 (0.036 M CH<sub>3</sub>CO<sub>2</sub>H-0.064 M CH<sub>3</sub>CO<sub>2</sub>Na) at different scan rates. The currents are normalized for scan rate,  $i/v$ . (b) Dependence of the current of the Ru(III/II) redox couple at ITO|*nano*ITO|**1-PO<sub>3</sub>H<sub>2</sub>** on the scan rate.

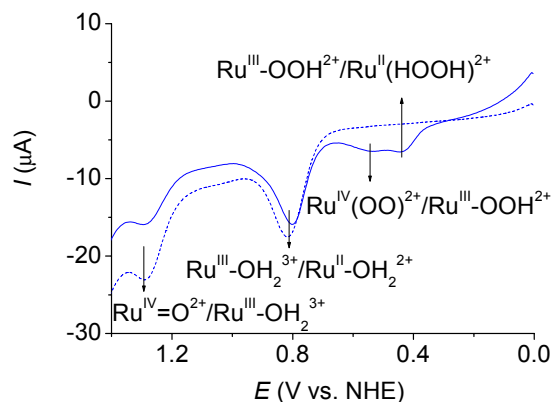

**Figure S6.** Square wave voltammogram of  $\text{Ru}^{\text{IV}}(\text{OO})^{2+}$  (generated by adding  $\times 3$   $\text{Ce}(\text{IV})$  to  $0.5$  mM  $\text{Ru}^{\text{II}}\text{-OH}_2^{2+}$ ) in  $0.1$  M  $\text{HNO}_3$  at a glassy carbon electrode. Incremental potential at each point,  $0.004$  V; square wave amplitude,  $0.025$  V; square wave frequency,  $15$  Hz. The dotted line represents the square wave voltammogram before  $\text{Ce}(\text{IV})$  oxidation.

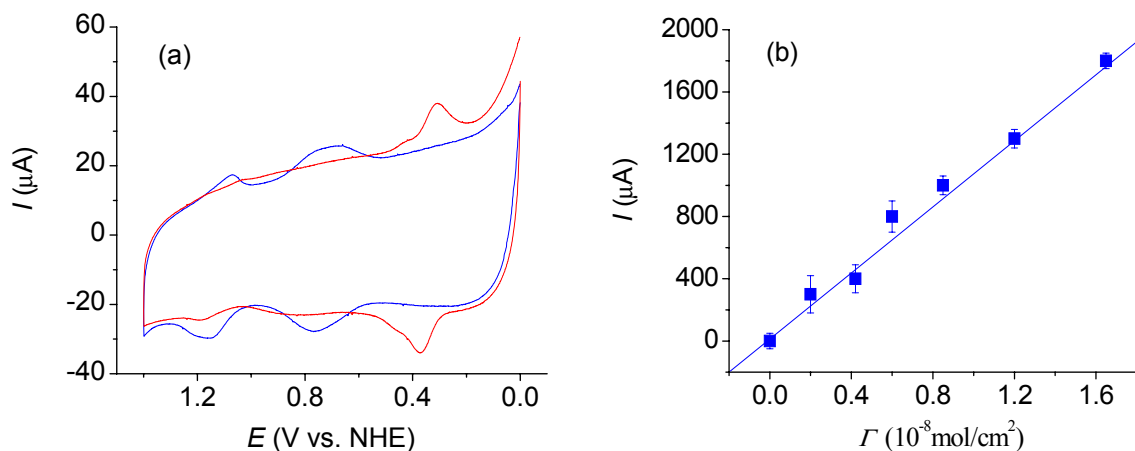

**Figure S7.** (a) Cyclic voltammograms of  $\text{ITO}|\text{nanoITO}|1\text{-PO}_3\text{H}_2$  at pH 3 ( $0.1$  M phosphate buffer) before (blue line) and after (red line) scanning to  $1.85$  V. Scan rate,  $10$  mV/s;  $\Gamma = 1.8 \times 10^{-9}$  mol/cm<sup>2</sup> ( $2.5 \square$  m,  $7.2 \times 10^{-10}$  mol/cm<sup>2</sup>· $\square$  m). (b) Dependence of the electrocatalytic

current (*nano*ITO background subtracted) at 1.85 V vs NHE at pH 5 (0.036 M CH<sub>3</sub>CO<sub>2</sub>H-0.064 M CH<sub>3</sub>CO<sub>2</sub>Na) on surface complex loading. Scan rate, 10 mV/s.

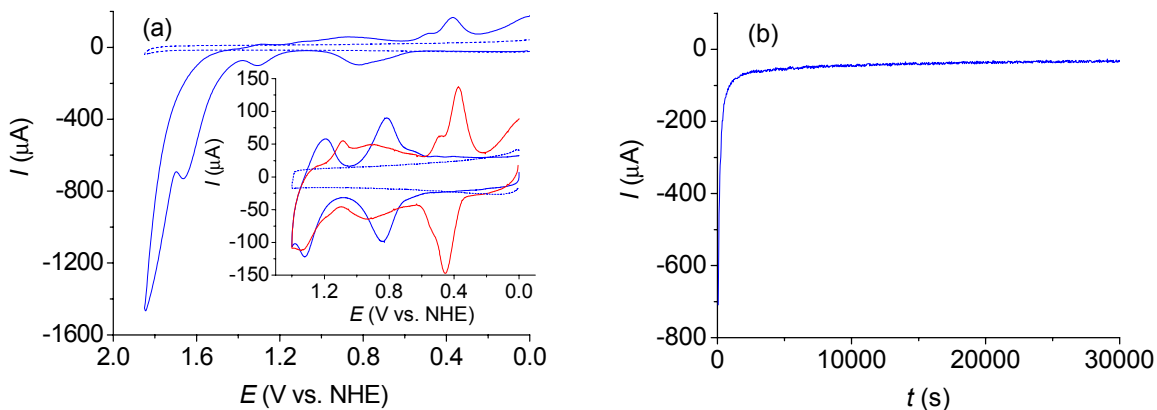

**Figure S8.** (a) Cyclic voltammogram of ITO|*nano*ITO|1-PO<sub>3</sub>H<sub>2</sub> at pH 1 (0.1 M HNO<sub>3</sub>) at a scan rate of 10 mV/s. The dotted line is the ITO|*nano*ITO background under the same experimental conditions. The inset shows cyclic voltammograms of ITO|*nano*ITO|1-PO<sub>3</sub>H<sub>2</sub> at pH 1 before (blue line) and after (red line) scanning to 1.85 V. (b) Electrolysis of ITO|*nano*ITO|1-PO<sub>3</sub>H<sub>2</sub> at 1.85 V vs NHE at pH 1. Number of turnovers  $\approx 180$ , turnover frequency  $\approx 0.006 \text{ s}^{-1}$  (background subtracted).  $\Gamma = 1.7 \times 10^{-8} \text{ mol/cm}^2$ , area = 1.25 cm<sup>2</sup>, current density  $\approx 40 \text{ } \square \text{ A/cm}^2$  (16  $\square \text{ A/cm}^2 \cdot \square \text{ m}$ ).

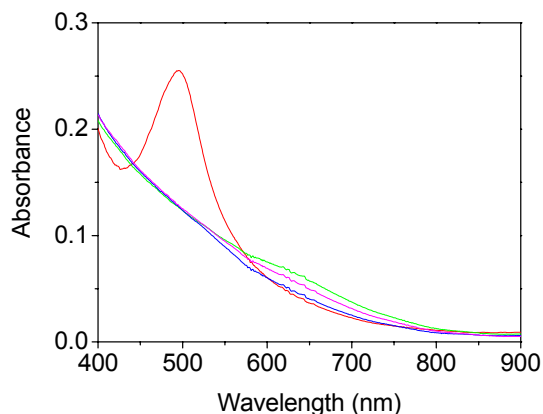

**Figure S9.** UV-vis spectra of ITO|*nano*ITO|1-PO<sub>3</sub>H<sub>2</sub> (red line), and following potential scans to 1.1 V (green line), 1.40 V (blue line) and 1.85 V (magenta line) vs NHE. Solution, pH 1 (0.1 M HNO<sub>3</sub>); scan rate, 10 mV/s.

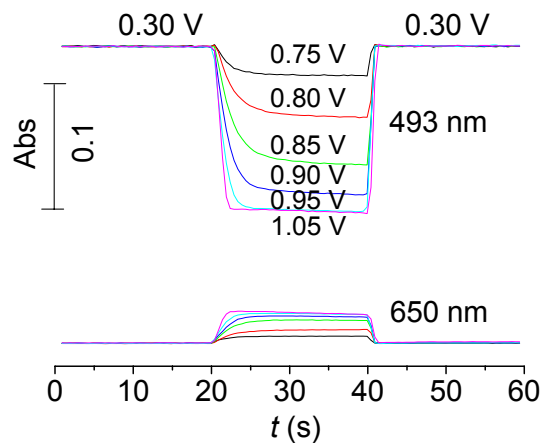

**Figure S10.** Changes in absorbance of ITO|*nano*ITO|1-PO<sub>3</sub>H<sub>2</sub> at 493 nm and 650 nm with time during a potential step from 0.30 V vs NHE to the potentials indicated in the figure, followed by step backward to 0.30 V. Solution, pH 1 (0.1 M HNO<sub>3</sub>).

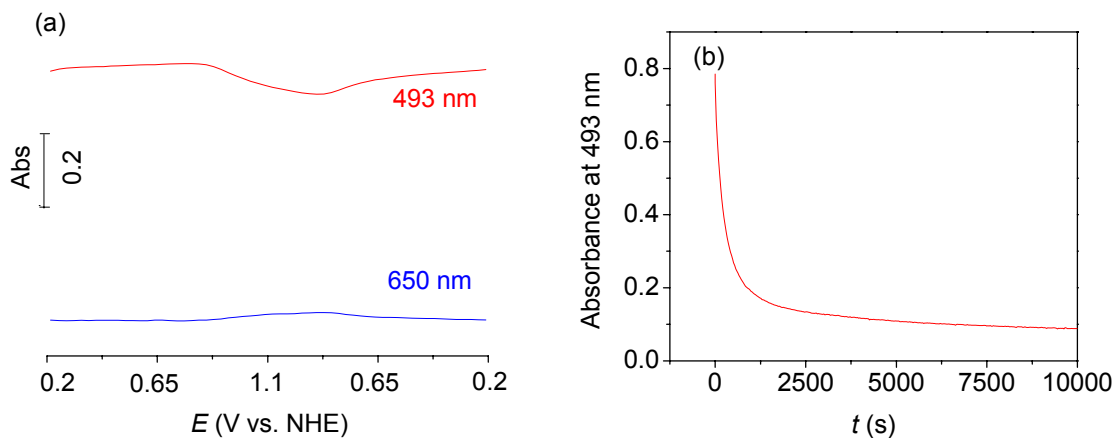

**Figure S11.** (a) Spectra evolution of FTO|*nano*TiO<sub>2</sub>|1-PO<sub>3</sub>H<sub>2</sub> at pH 1 (0.1 M HNO<sub>3</sub>) during CV scan between 0.2 - 1.1 V. The monitoring wave lengths are  $\lambda_{\text{max}} = 493$  nm for Ru<sup>II</sup>-OH<sub>2</sub><sup>2+</sup> (red line), and  $\lambda_{\text{max}} = 650$  nm for Ru<sup>III</sup>-OH<sub>2</sub><sup>3+</sup> (blue line). Scan rate, 10 mV/s. *nano*TiO<sub>2</sub>  $\Gamma = 5.3 \times 10^{-8}$  mol/cm<sup>2</sup> (10  $\square$  m,  $5.3 \times 10^{-9}$  mol/cm<sup>2</sup>· $\square$  m). Only ~8% of the available sites were electroactive as calculated from the absorption decrease at  $\lambda_{\text{max}} = 493$  nm during 10 mV/s cyclic scan. (b) Absorbance change (493 nm) of FTO|TiO<sub>2</sub>|1-PO<sub>3</sub>H<sub>2</sub> at pH 1 (0.1 M HNO<sub>3</sub>) with potential hold at 0.95 V vs NHE past  $E_{1/2}$  for Ru<sup>III</sup>-OH<sub>2</sub><sup>3+</sup>/Ru<sup>II</sup>-OH<sub>2</sub><sup>2+</sup> couple.
